# Supplementary material for: Necroptosis in pancreatic cancer promotes cancer cell migration and invasion by release of CXCL5
Source: PubMed Central journal article supplement (PMC6991976; doi:10.1371/journal.pone.0228015), 2020-01-30

Fig1 d

### RIP3

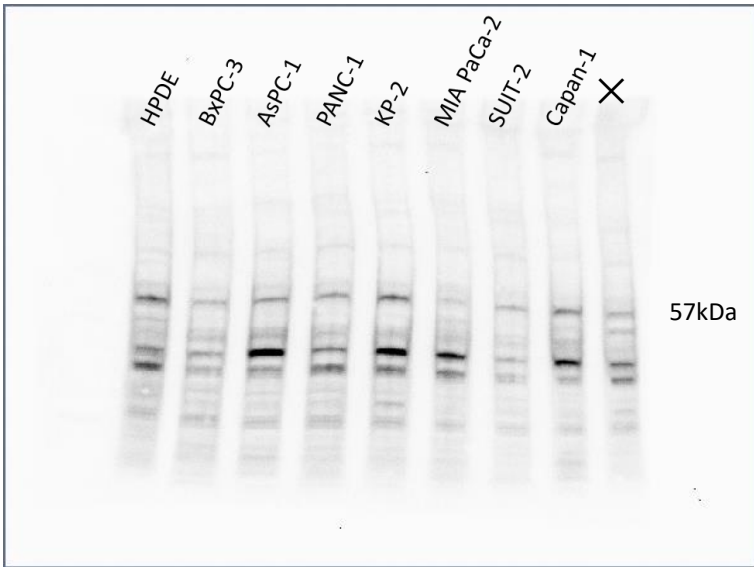

### MLKL

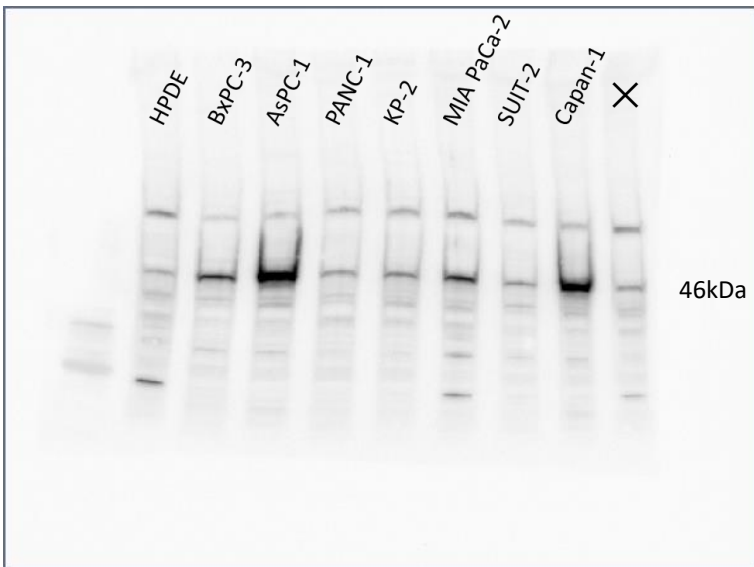

### $\beta$ -actin

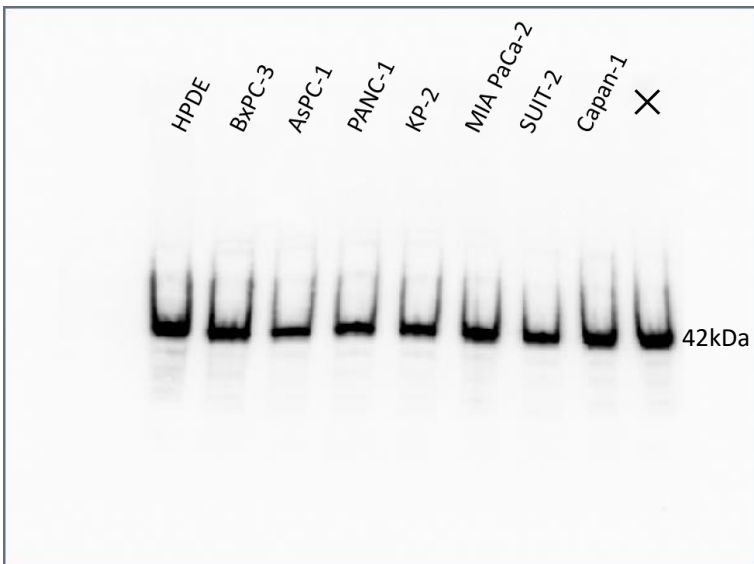

Fig2 d

p-MLKL

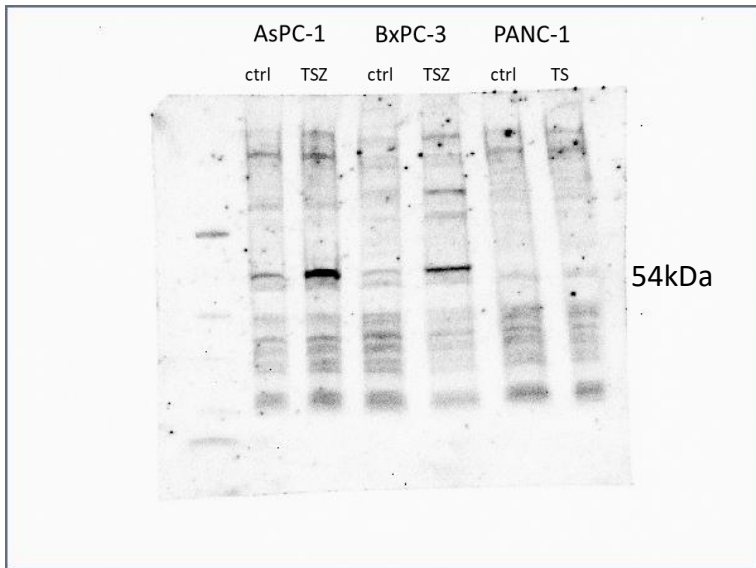

$\beta$ -actin

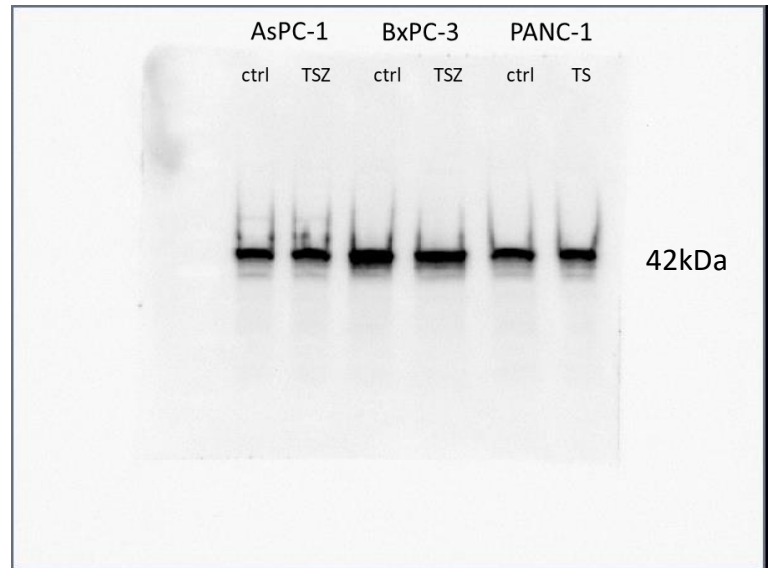

MLKL

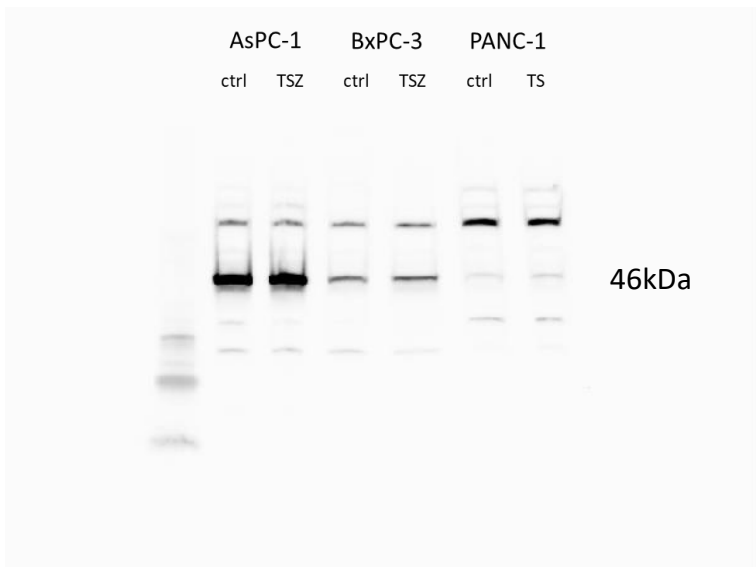

Caspase-8

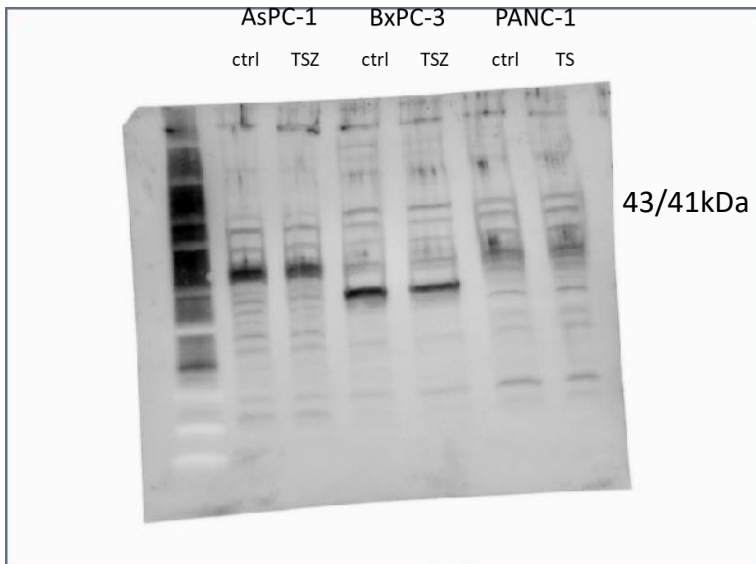

Fig4 g

CXCR2

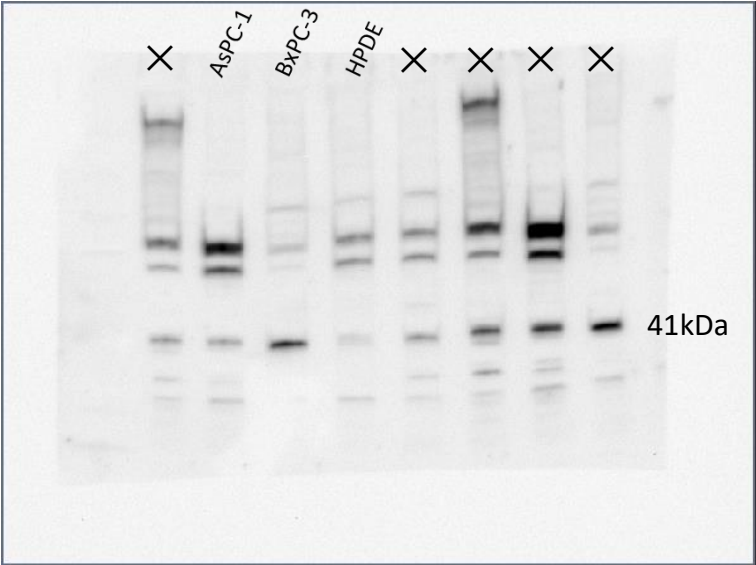

$\beta$ -actin

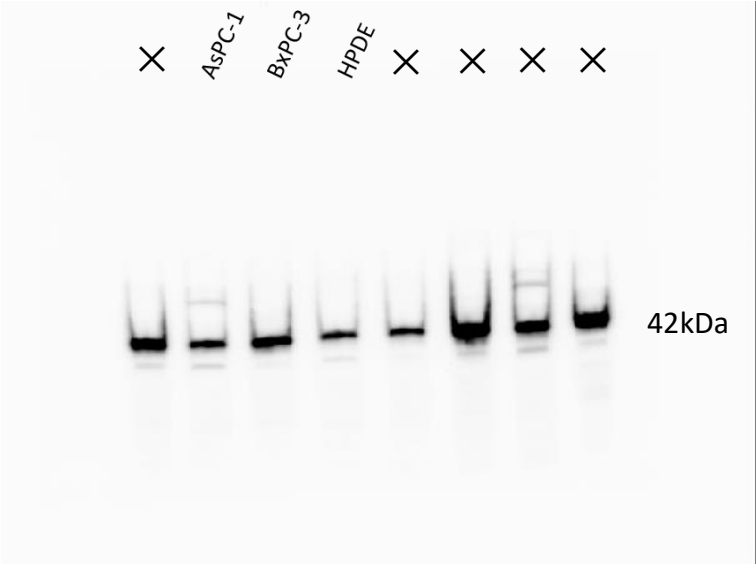

Fig5 e

CXCR2

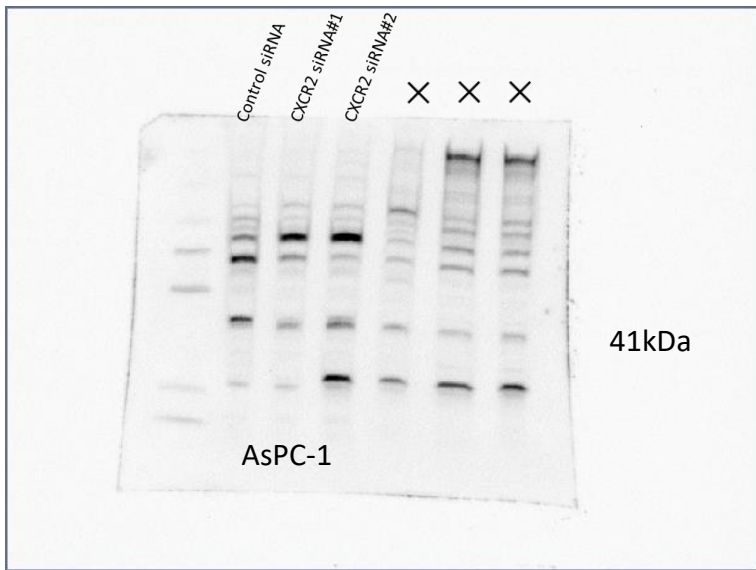

CXCR2

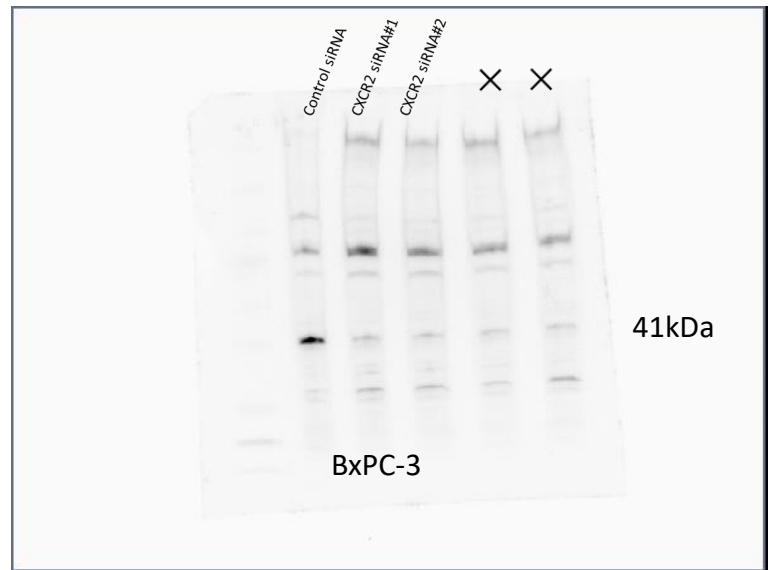

$\beta$ -actin

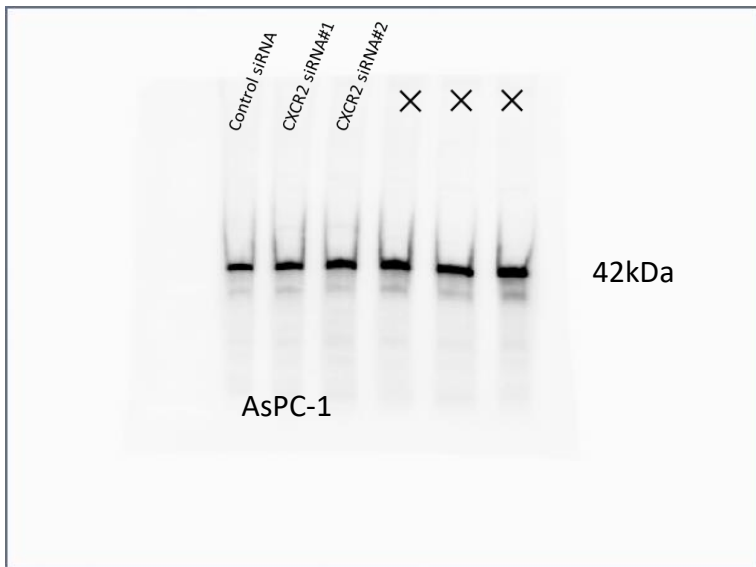

$\beta$ -actin

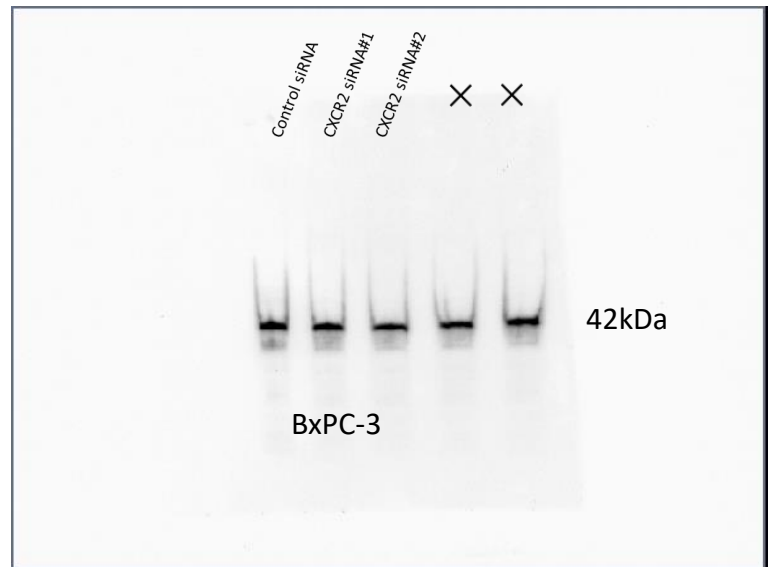

Fig7 d

CXCR2

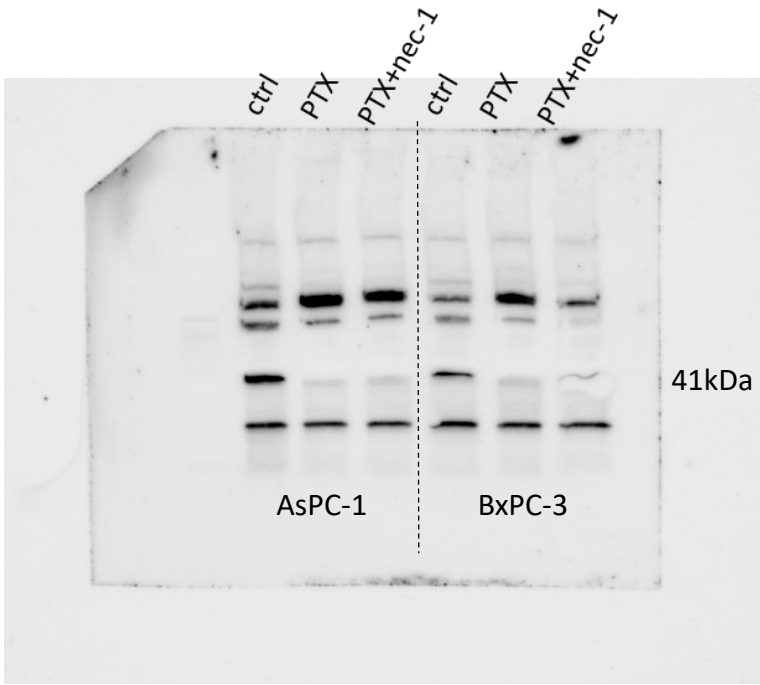

p-MLKL

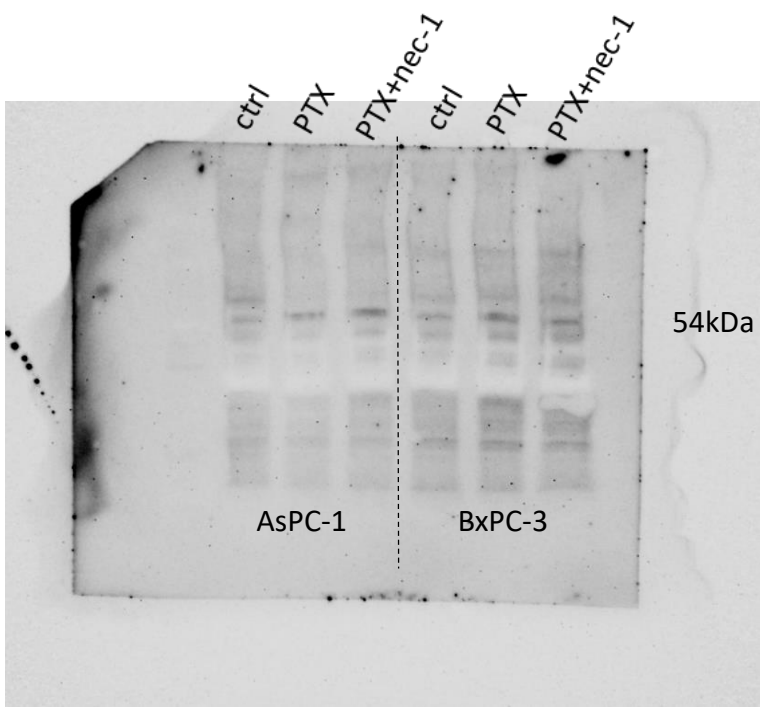

Caspase-8

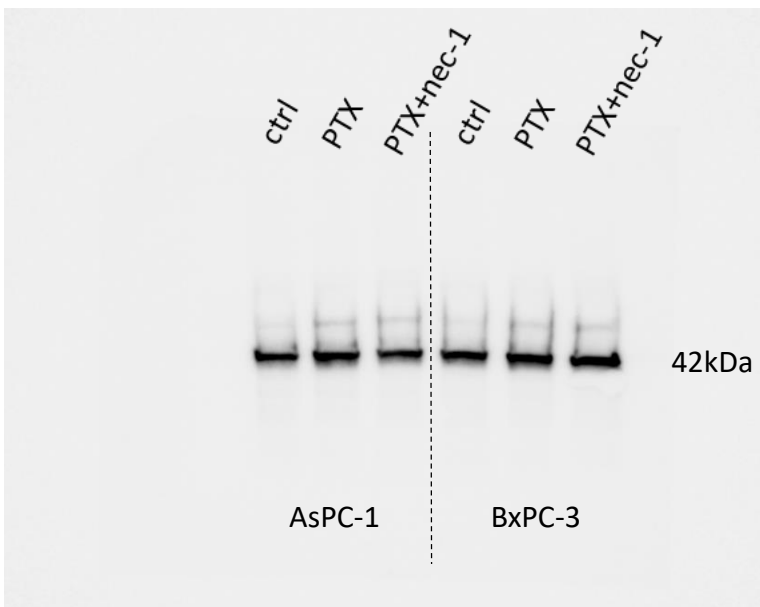

p-MLKL

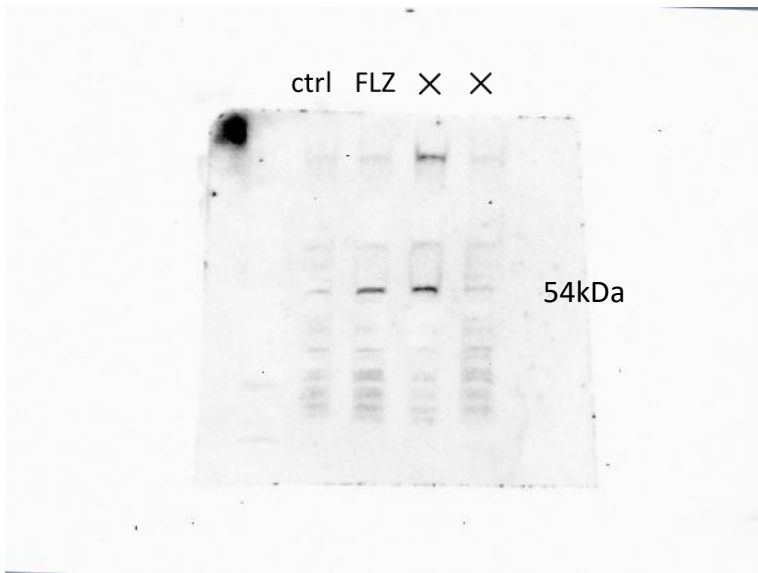

$\beta$ -actin

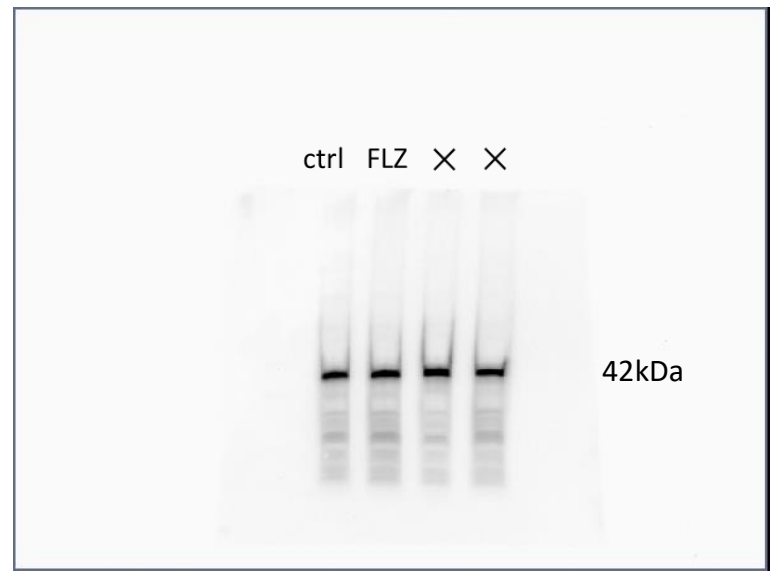

MLKL

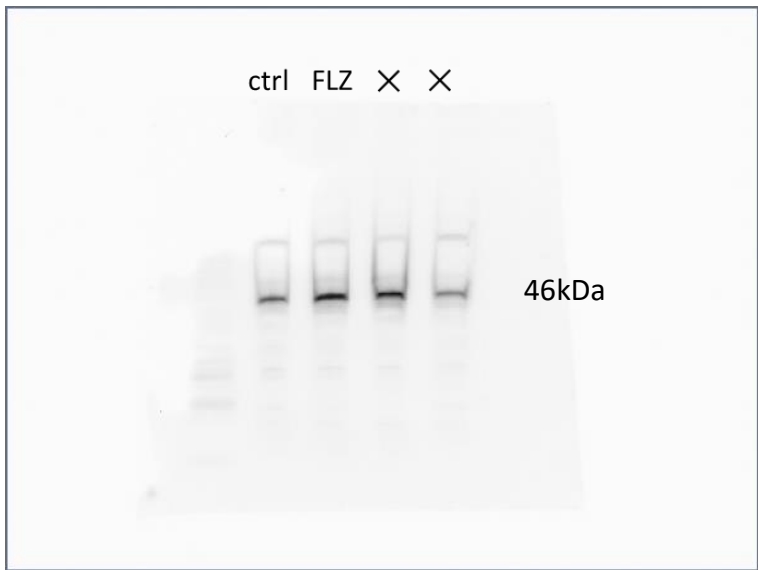

Caspase-8

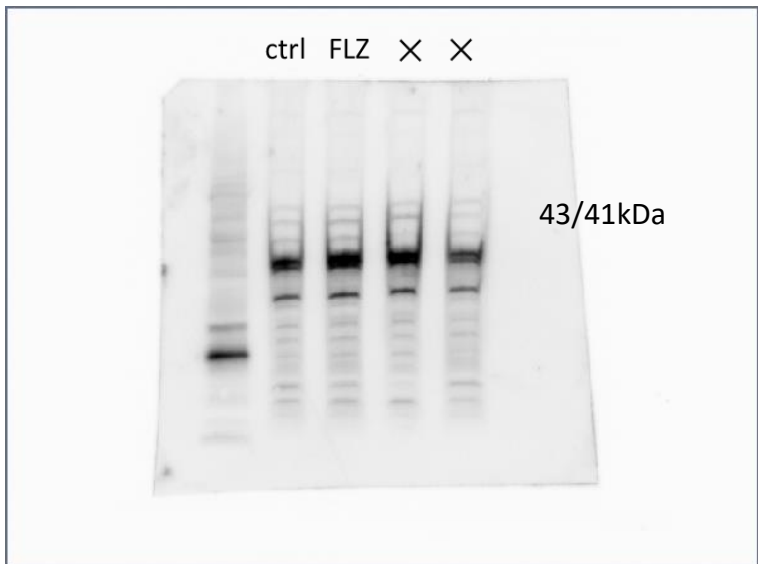

CXCL5

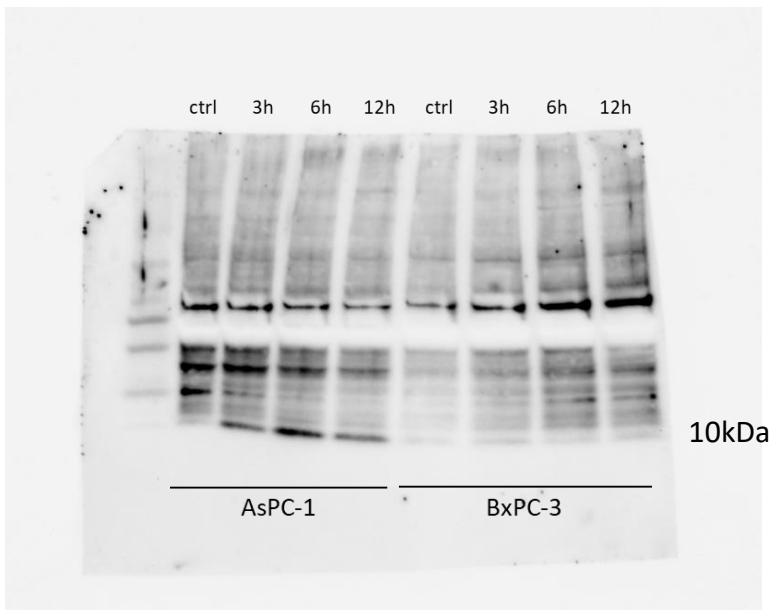

$\beta$ -actin

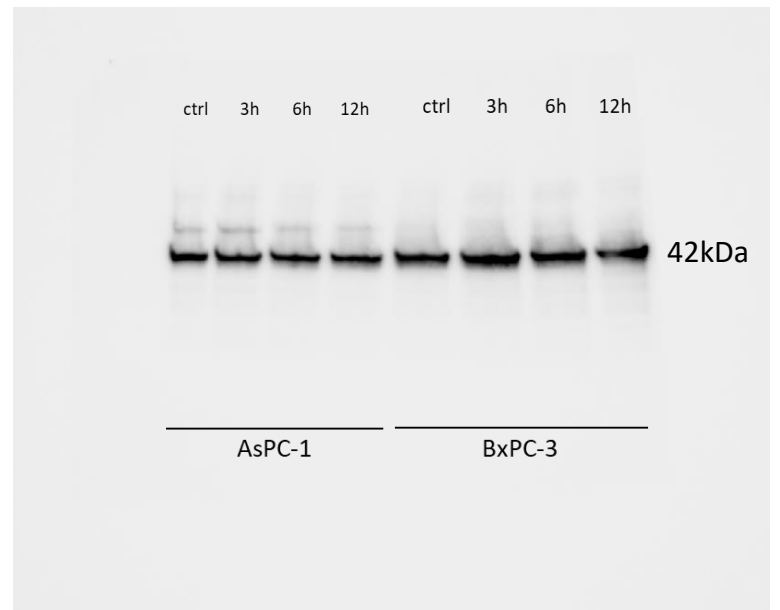

CXCR2

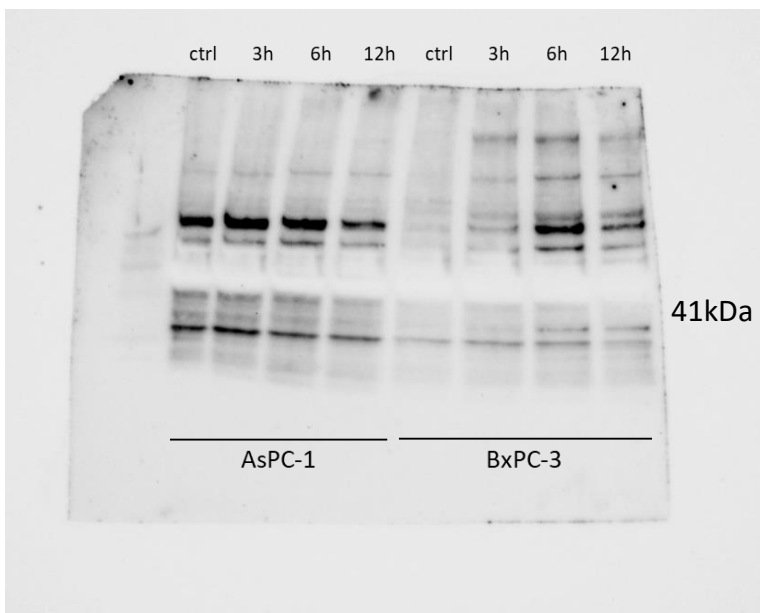

p-MLKL

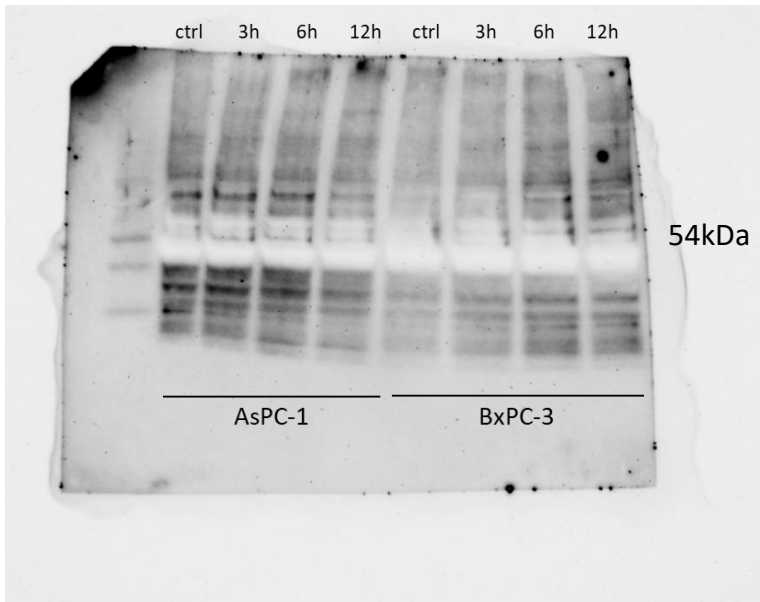

Supplement: pone.0228015.s003.pdf [file pone.0228015.s003.pdf]
